# Supplementary material for: Splicing factor BUD31 promotes ovarian cancer progression through sustaining the expression of anti-apoptotic BCL2L12
Source: PubMed Central journal article supplement (PMC9587234; doi:10.1038/s41467-022-34042-w), 2022-10-21
Supplement: 41467_2022_34042_MOESM1_ESM.pdf [file 41467_2022_34042_MOESM1_ESM.pdf]

# Supplementary Information

## Supplementary Figures

Figure S1, related to Figure 1

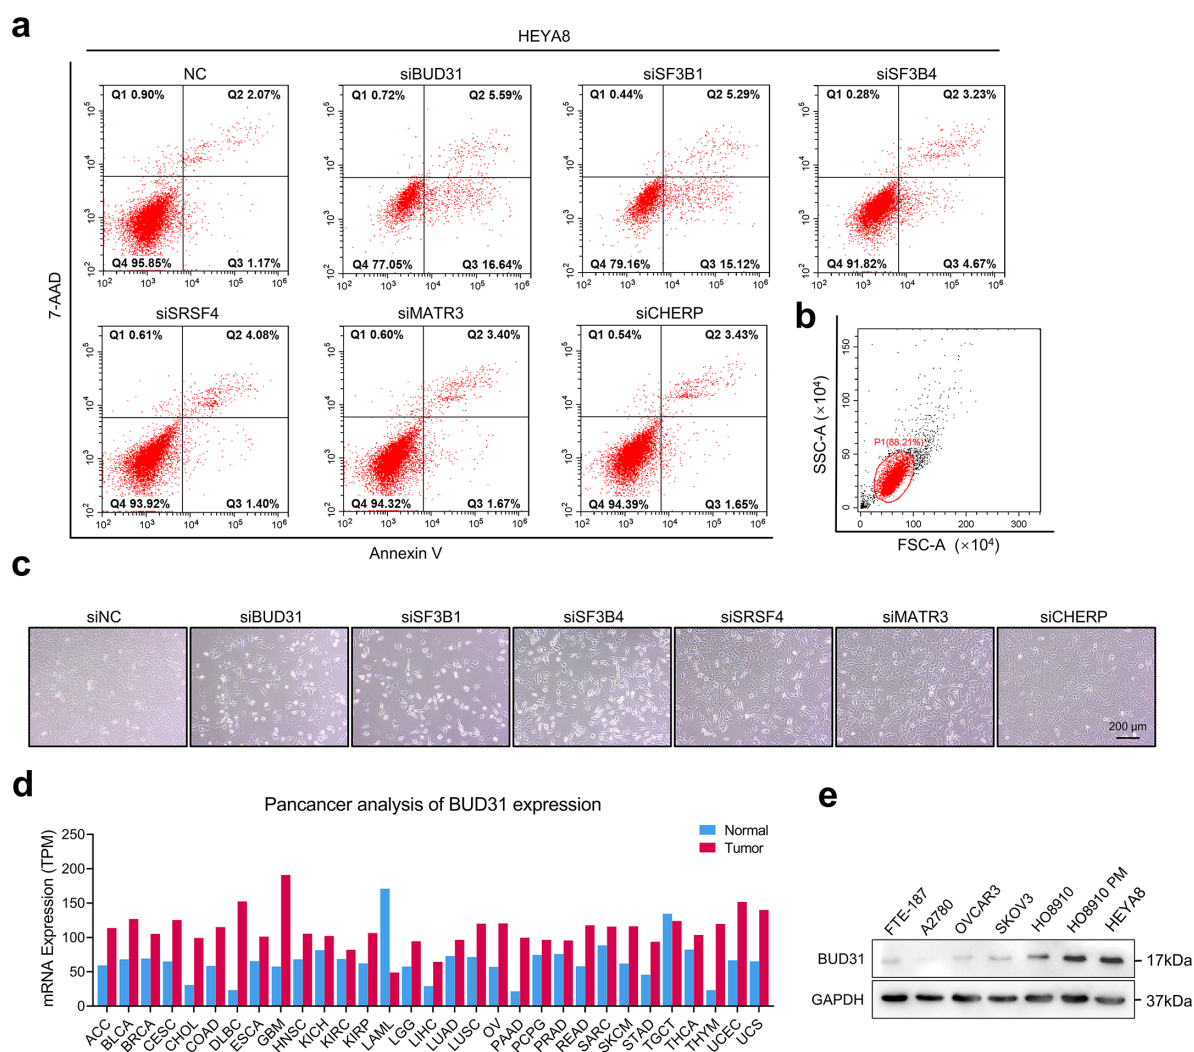

**Figure S1. RNAi screen of six splicing factors and BUD31 expression across all TCGA tumors**

**and ovarian cancer cell lines, related to Figure 1. (a)** Flow cytometry assay was performed to

determine the apoptosis cells percentage after siBUD31, siSF3B1, siSF3B4, siSRSF4, siMATR3,

and siCHERP treatment. **(b)** Representative gating strategy of flow cytometry in detecting apoptosis cells. **(c)** Representative light microscopy photos of HEYA8 cells treated with siBUD31, siSF3B1, siSF3B4, siSRSF4, siMATR3, and siCHERP. Scale bar, 200  $\mu\text{m}$ . **(d)** Pan-cancer analysis of mRNA expression of *BUD31*. Expression profiles of tumor and normal samples were from TCGA and GTEx databases. **(e)** *BUD31* protein expression in ovarian cancer cell lines compared with FTE187, an immortalized fallopian tube cell line. Source data are provided as a Source Data file.

Figure S2, related to Figure 2

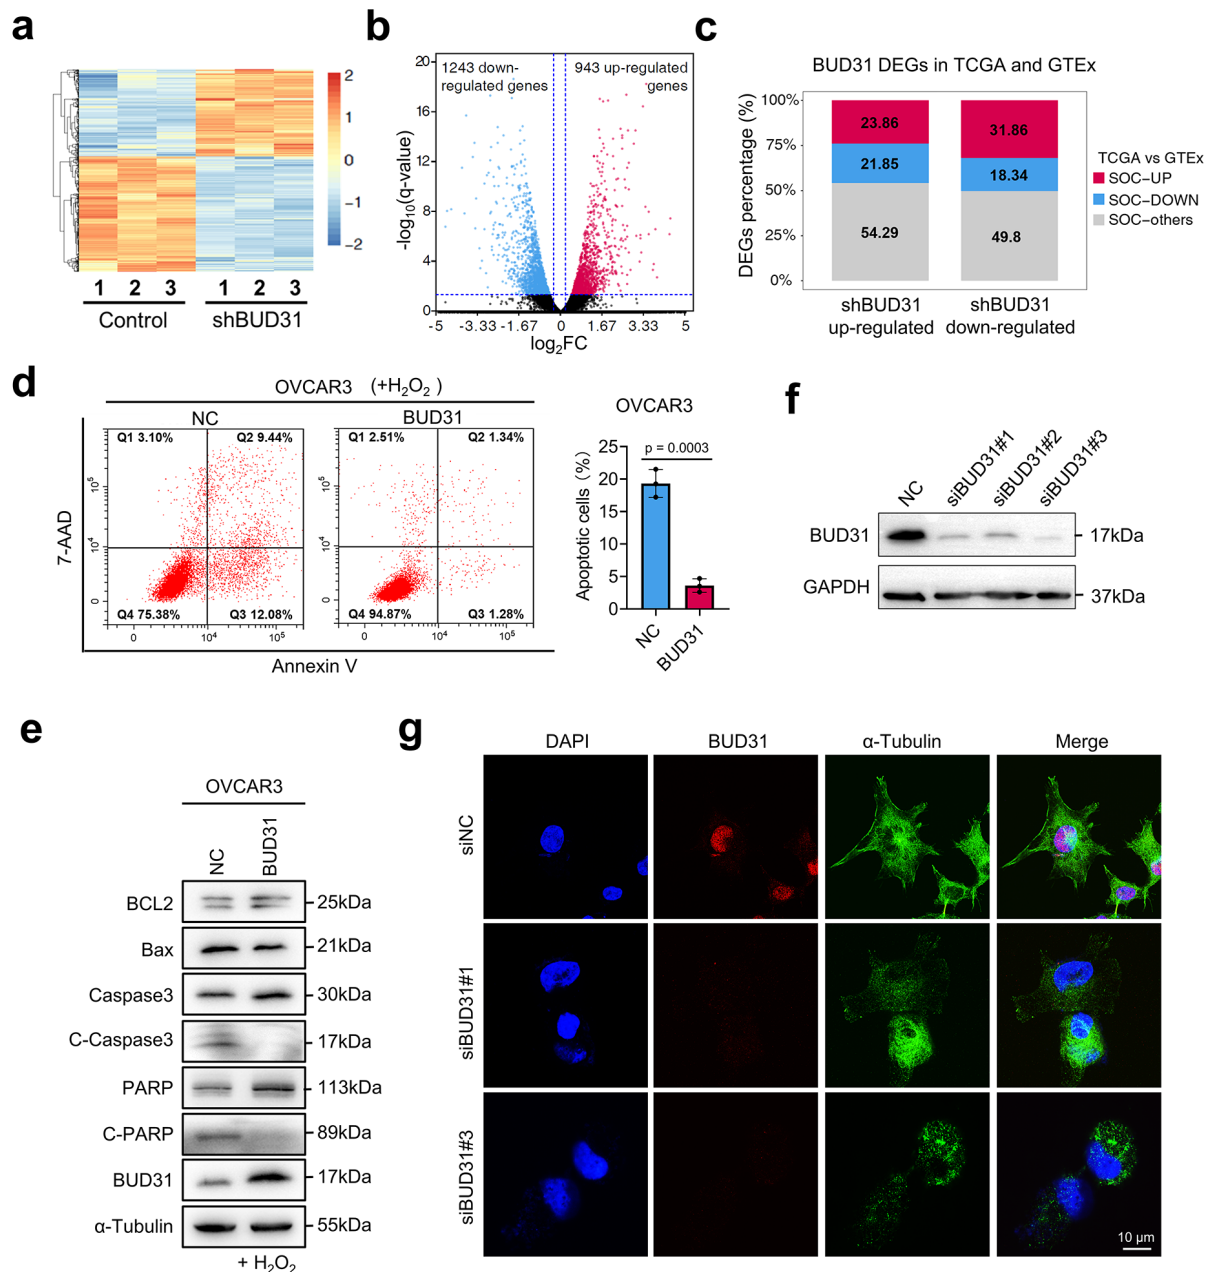

**Figure. S2. Differentially expressed genes after BUD31 knockdown and BUD31 knockdown induced cell apoptosis, related to Figure 2. (a)** Heatmap of the gene expression profile in HEYA8 cells knocking down BUD31 with corresponding control (n = 3 independent samples per group). **(b)** Volcano plot of differentially expressed genes (DEGs) in HEYA8 cells silencing BUD31 induced by doxycycline. The cutoff was set as q-value < 0.05 and fold change (FC) > 1.7 or < 0.6. 1243 genes were downregulated, and 943 genes were upregulated. **(c)** The gene expression of the DEGs in HGSOC samples (n = 374) in the TCGA database versus normal ovaries (n = 180) in the GTEx database. The percentages of the DEGs belonging to the high or low expression genes in HGSOC were shown. **(d)** Apoptotic cells staining with Annexin V/7-AAD were detected by flow cytometry in OVCAR3 cells with BUD31 overexpression (n = 3 biologically independent experiments). Apoptotic cells percentage included early and late apoptotic cells. Cells were treated with 400  $\mu$ M H<sub>2</sub>O<sub>2</sub> for 4 h before detection. **(e)** Apoptotic markers' expression was detected by western blot after BUD31 overexpression in OVCAR3 cells in the presence of H<sub>2</sub>O<sub>2</sub>. C-Caspase3, cleaved-caspase3. C-PARP, cleaved-PARP. **(f)** The efficiency of a siRNA suit silencing BUD31 was verified with western blot. **(g)** Tubulin structure and cell morphological changes were detected with high-speed confocal laser scanning. Two effective siRNA targeting BUD31 (siBUD31#1 and siBUD31#3) were used for silencing. Scale bar, 10  $\mu$ m. P-value was obtained by unpaired two-tailed Student's t-test **(d)**, and the results are presented as the mean  $\pm$  S.D. Source data are provided as a Source Data file.

Figure S3, related to Figure 3

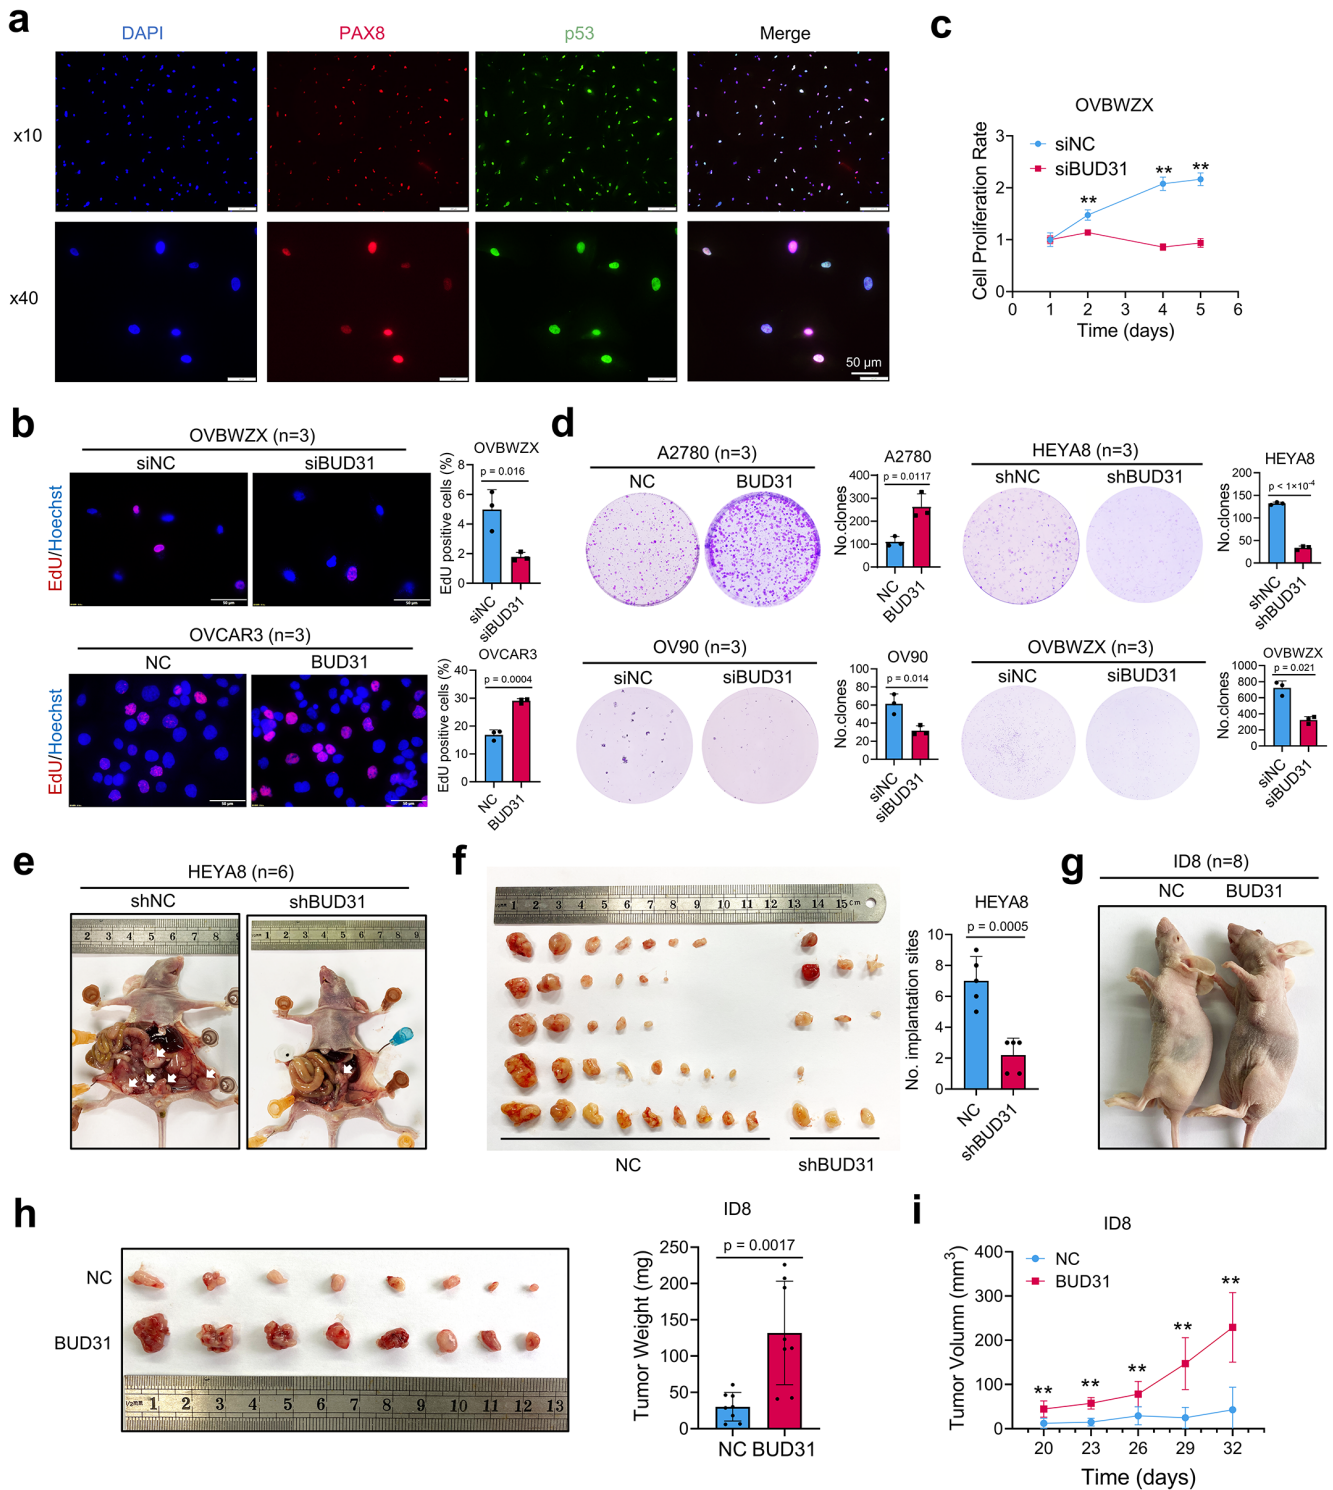

**Figure. S3. Knockdown BUD31 inhibits ovarian cancer growth *in vitro* and *in vivo*, related to**

**Figure 3.** (a) Immunofluorescence stain of ovarian cancer marker PAX8 and p53 in OVBWZX cells derived from ovarian cancer patient's ascites. Scale bar, 50  $\mu\text{m}$ . (b) EdU assay in primary ovarian cancer cells OVBWZX and OVCAR3 silencing BUD31 (n = 3 biologically independent experiments). Scale bar, 50  $\mu\text{m}$ . (c) MTT assay was performed to determine the cell viability in OVBWZX cells knocking down BUD31 (n = 4 biologically independent experiments). (d) The clonogenic assay was performed in ovarian cancer cell lines with BUD31 overexpression (A2780 and OV90) or knockdown (HEYA8 and OVBWZX) compared to corresponding controls (n = 3 biologically independent experiments). (e-f) Xenograft tumors from intraperitoneal injection with HEYA8 cells silencing BUD31 or corresponding control (e) and the number of peritoneal implantation sites were counted (n = 5 mice per group when the mice were sacrificed, one pair dead). Representative images after exploratory laparotomy showed peritoneal implantation (f). (g-i) Representative images of xenograft nude mice (g), xenograft tumor weight (h), and volume (i) in mice subcutaneously injected with ID8 cells with BUD31 overexpression compared to the corresponding control (n = 8 mice per group). P-value was obtained by unpaired Student's t-test, two-tailed (b, c, d, f, h, i), and the results are presented as the mean  $\pm$  S.D. \*p < 0.05, \*\*p < 0.01

Figure S4, related to Figure 4

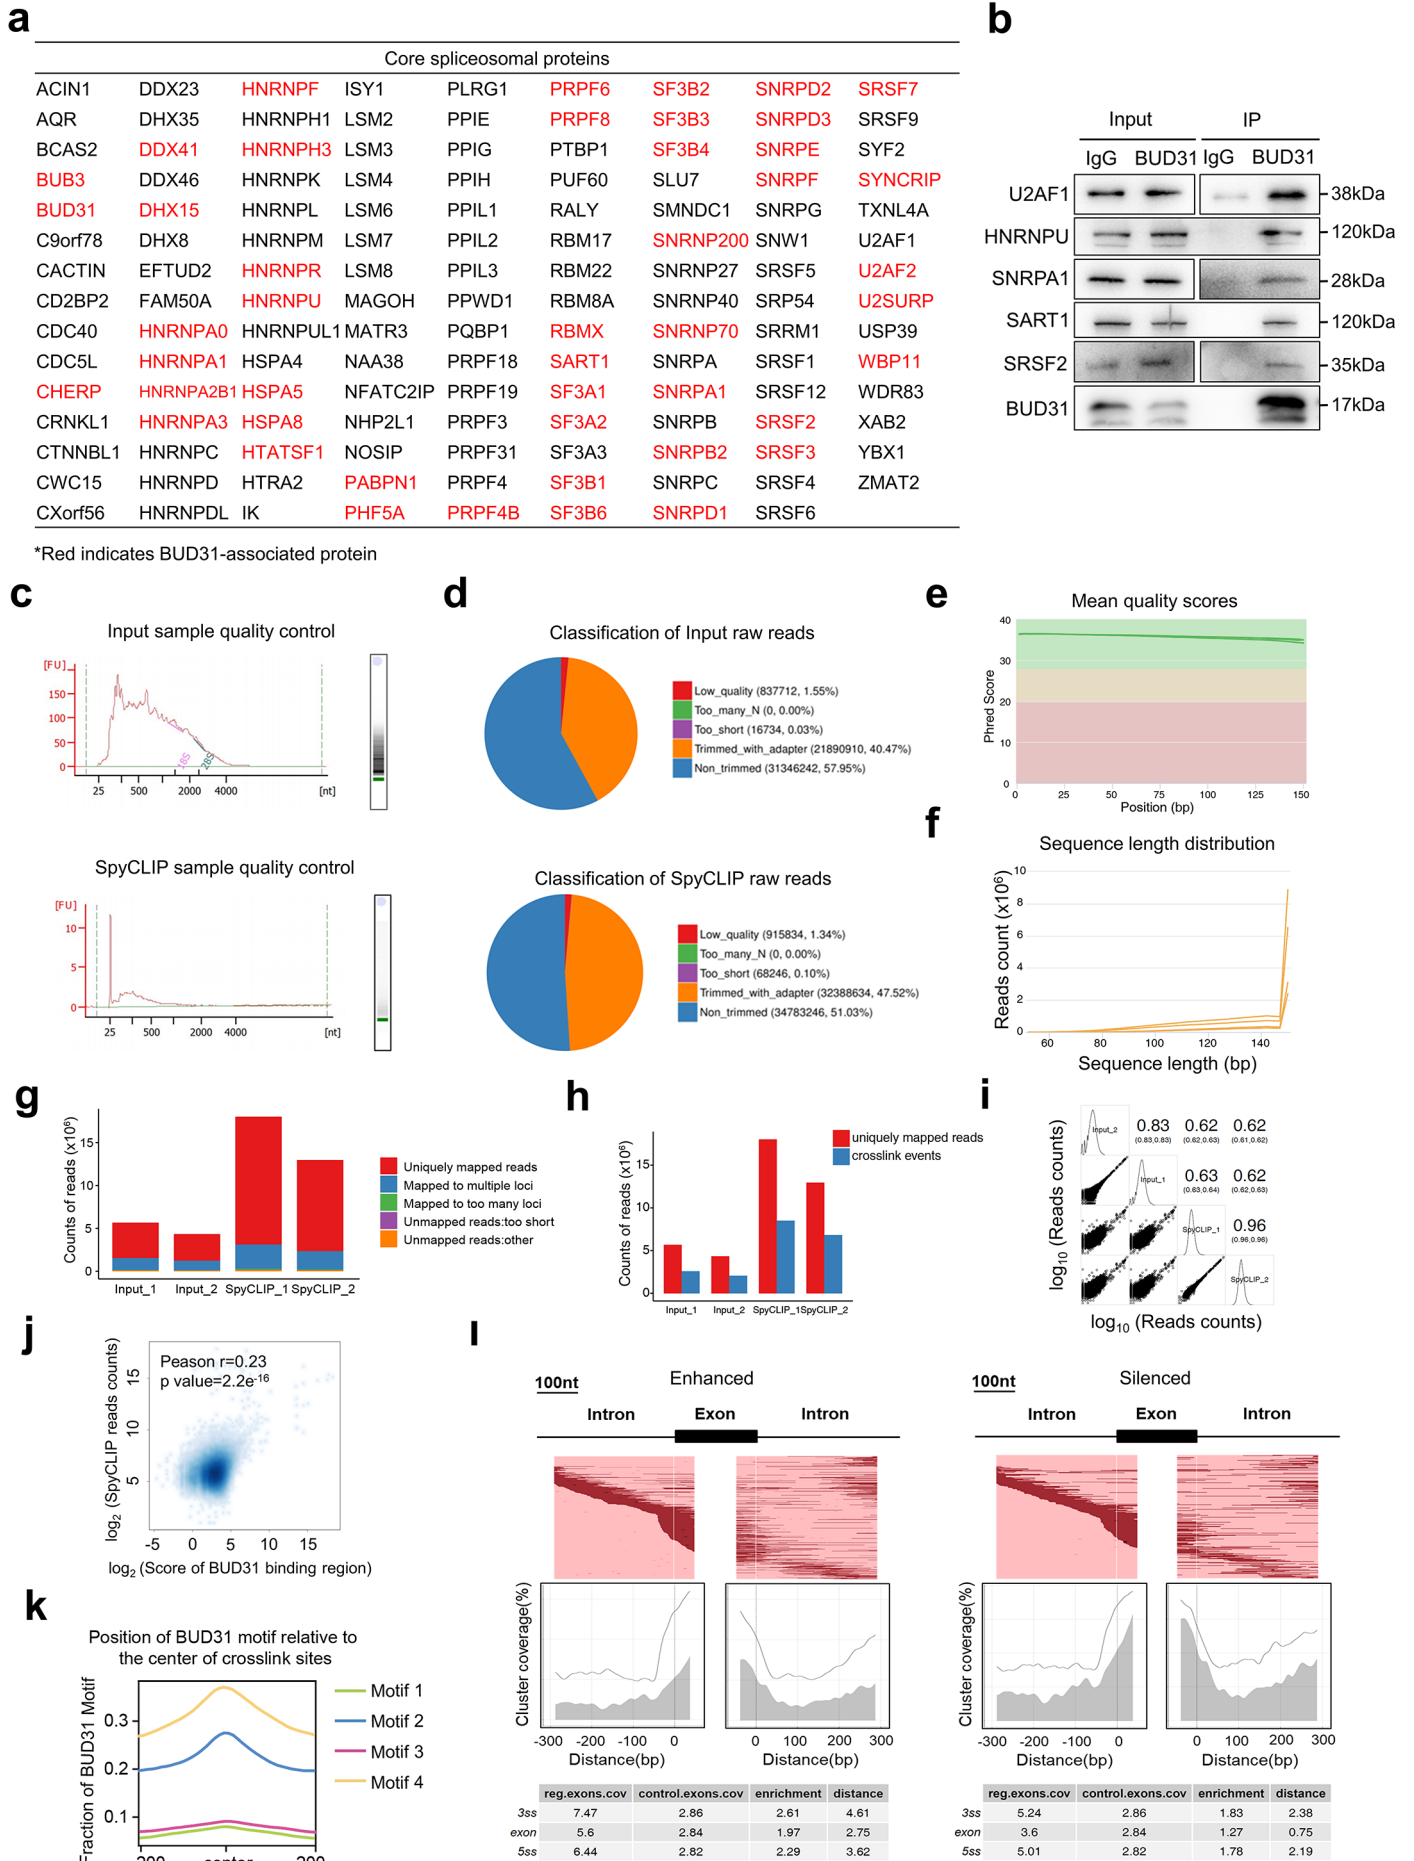

**Figure. S4. BUD31 interacts with other core splicing factors and the quality control of SpyCLIP sequencing, related to Figure 4.** (a) Proteins interacting with BUD31 among the 134 core splicing factors. BUD31-associated proteins resulting from IP-MS were colored in red. (b) Western blot analysis of co-immunoprecipitation (Co-IP) of U2AF1, HNRNPU, SNRAP1, and SART1 from HEYA8 cells with BUD31 antibody. Rabbit IgG was used as a negative control. BUD31 itself was also detected to prove efficiency. (c) BUD31 SpyCLIP library quality control and length distribution of Input and SpyCLIP samples examined with Agilent 2100. (d) Sequencing reads of Input and SpyCLIP samples. Reads with adaptors, too many N, too short reads, and low-quality reads were removed. (e, f) Phred means quality score (e) and reads length distribution (f) of the Input and SpyCLIP samples (n = 2 samples per group). (g, h) Alignment result of sequencing reads to human hg38 genome by STAR (g). Uniquely mapped reads were selected and deduplicated into crosslink events (h). (i) Repeatability and independence verification of SpyCLIP samples by aligning reads to the BUD31 binding regions. (j) Correlation between SpyCLIP reads counts and PURECLIP score of BUD31 binding regions. P-value was calculated by a two-tailed Pearson's Correlation. (k) Position of BUD31 motifs relative to the center of crosslink sites. 200 bp upstream and downstream was shown. (l) A binding map of BUD31 near the intron-exon junction of regulated alternative exons in HEYA8 cells. Each row of the heatmap shows a BUD31-regulated exon with its flanking regions. The dark red line represents the position of clusters. The enrichment of the clusters around the regulated exons compared to the control is plotted below. Left, enhanced splicing sites; right, silenced splicing sites. Source data are provided as a Source Data file.

Figure S5, related to Figure 5

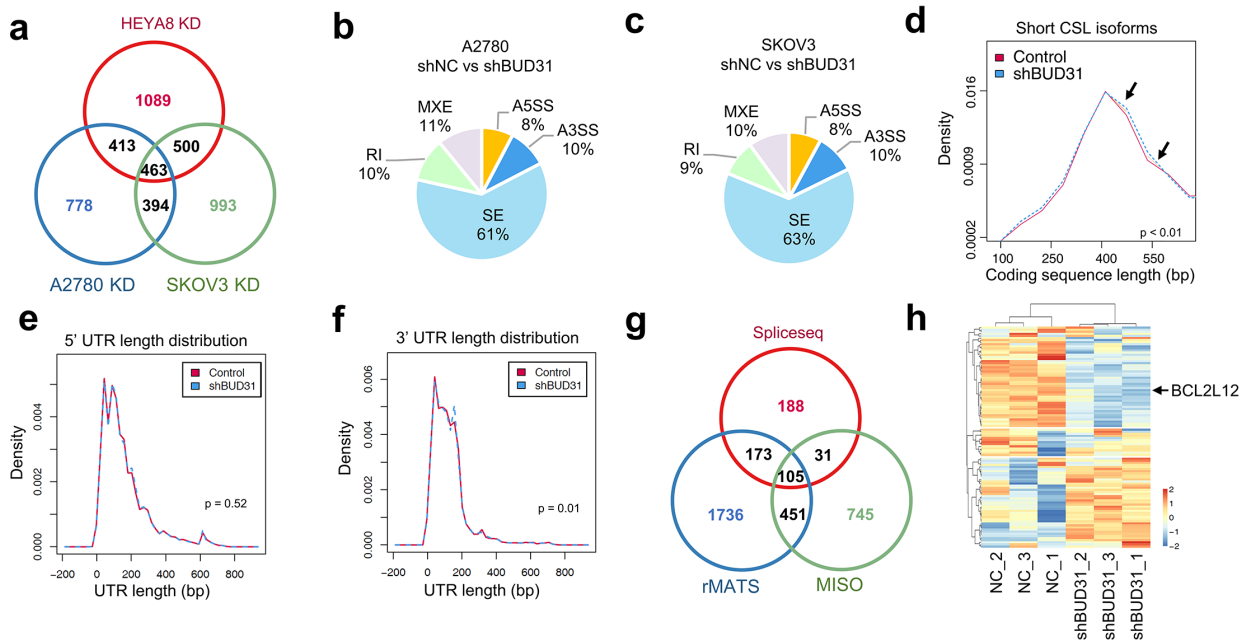

**Figure. S5. BUD31 knockdown induces global alternative splicing and isoform switch, related to Figure 5.** (a) AS analysis based on RNA-seq data of dox-inducible BUD31 knockdown A2780, SKOV3, and HEYA8 cells. 463 same targets were identified in the three cell lines. (B, C) Pie chart depicting the proportions of different types of AS events in the RNA-seq data from A2780 (b) and SKOV3 (c) cells after BUD31 knockdown. Specific differential AS events were analyzed with rMATS and were filtered out with  $p < 0.05$  and  $|\text{IncLevelDifference}| > 0.1$ . SE, skipped exons; R.I., retained introns; A5SS, alternative 5' splice site; A3SS, alternative 3' splice site; MXE, mutually exclusive exons. (d-f) Density plot of short coding sequence (d), 5' untranslated region (5' UTR) (e), and 3' untranslated region (3' UTR) (f) length distribution with silencing BUD31 in HEYA8 cells. UTR length was calculated using SpliceR with the reconstructed transcripts by Cufflinks. P-value was calculated inside the R package sm. (g) rMATS, SpliceSeq, and MISO analyzed alternative splicing events. 2465, 497, and 1332 events were identified by the three algorithms separately, and 105 events were common to all three sets of results. (h) The gene expression profile of the 105 AS genes after BUD31 knockdown. The downregulated BCL2L12 was shown with a black arrow.



Figure S6, related to Figure 6 and Figure 7

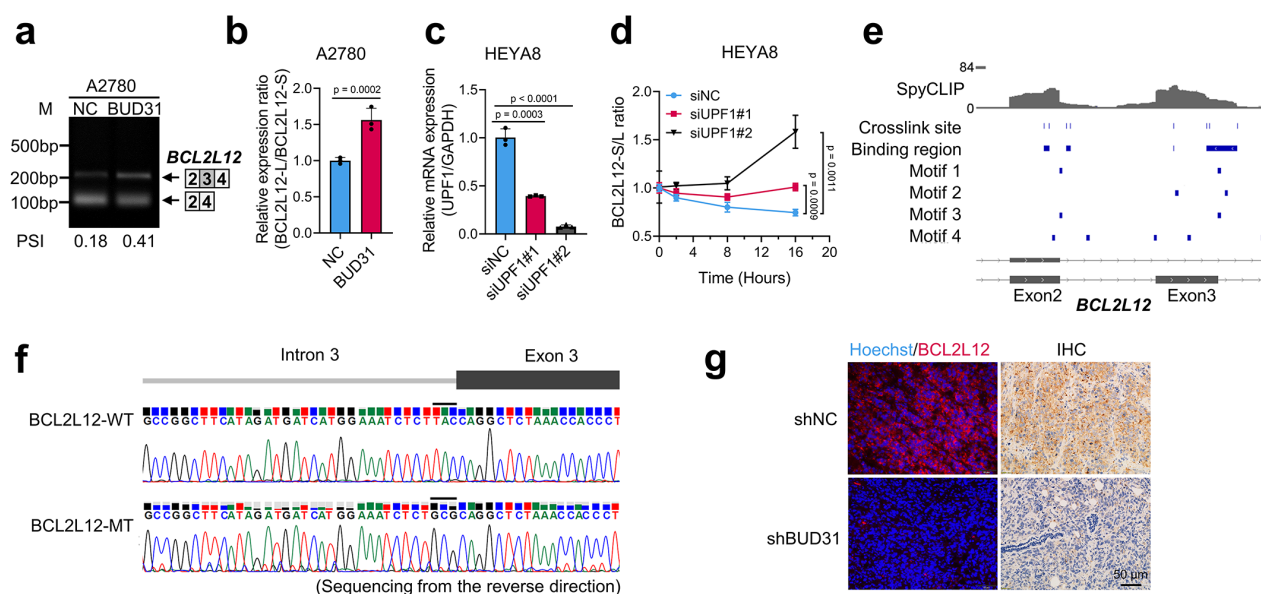

**Figure. S6.** *BCL2L12-S* is NMD sensitive, and BUD31 binding sites on pre-mRNA of *BCL2L12*, related to Figure 6 and Figure 7. (a) Semi-quantitative RT-PCR was performed in A2780 cells overexpression BUD31 to validate *BCL2L12* AS event. (b) The relative transcripts expression ratio of *BCL2L12-L/S* after BUD31 overexpression in A2780 cells was determined by RT-qPCR. (c) The efficiency of 2 siRNA targeting UPF1 was determined with RT-qPCR. (d) The remaining *BCL2L12-S/L* mRNA ratio was calculated at 0 h, 2 h, 8 h, and 16 h after 10  $\mu$ g/ml actinomycin D treatment. siUPF1 (red) was compared with siNC (blue). The residual RNAs were normalized to 0 h. (e) BUD31 binding motifs around the regulated exon3 of *BCL2L12*. SpyCLIP reads signal was shown in gray and crosslink sites, and BUD31 binding regions and motifs were shown in blue. (f) Sanger sequencing results of *BCL2L12* intron3 fragments used for RNA pull-down assay. Mutant fragment (*BCL2L12-I3-MT*) replaced TAC with GCG at the Exon3-Intron3 junction site. (g) *BCL2L12* expression *in vivo* of the xenograft tumor with BUD31 knockdown HEYA8 cells was determined by immunofluorescence and immunohistochemistry stains. Scale bar, 50  $\mu$ m. P-value was obtained by two-tailed unpaired Student's t-test (b, c, d).

Figure S7, related to Figure 7

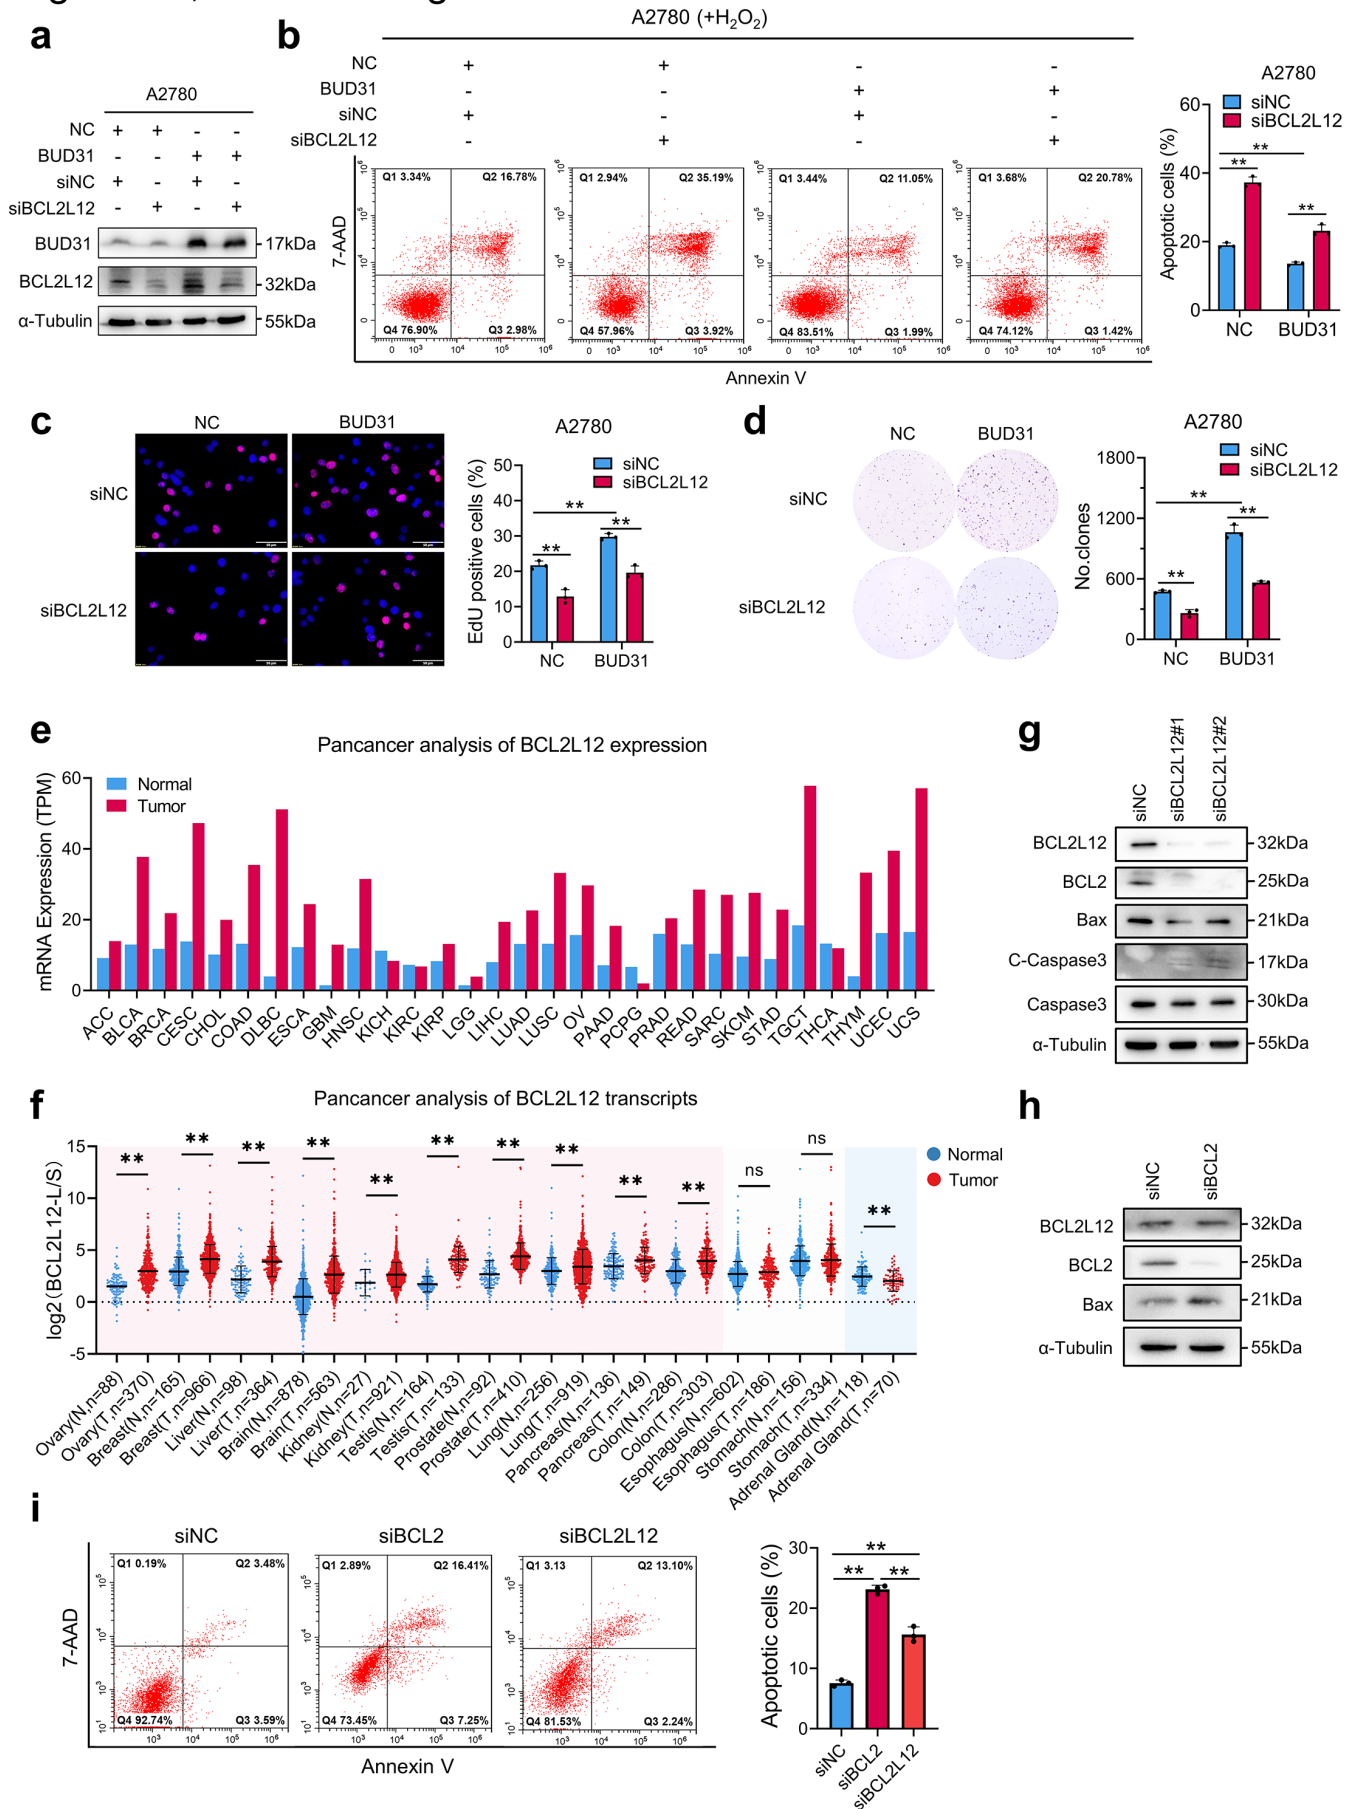

**Figure. S7. BUD31 exerts its oncogenic effects in ovarian cancer by regulating BCL2L12, related to Figure 7. (a)** Protein expression of BUD31 and BCL2L12 was determined with western blot in A2780 cells. **(b)** Apoptotic cells were detected by flow cytometry after BCL2L12 knockdown and BUD31 overexpression in A2780 cells. A2780 cells were treated with H<sub>2</sub>O<sub>2</sub> with a final concentration of 400  $\mu$ M for 4 h before apoptosis detection. **(c-d)** EdU **(c)** and clonogenic assay **(d)** indicated that knockdown BCL2L12 could attenuate the proliferation and clonogenic ability after BUD31 overexpression in A2780 cells. Scale bar, 50  $\mu$ m. **(e-f)** *BCL2L12* pan-cancer expression **(e)** and *BCL2L12L/S* transcripts ratio **(f)** of tumor samples in TCGA database paired with normal tissues in Genotype-Tissue Expression Project (GTEx) database. **(g)** Western blot determined BCL2, Bax, and cleaved-caspase3 (C-Caspase3) protein expression after BCL2L12 knockdown. **(h)** Western blot determined BCL2L12 and Bax protein expression after BCL2 knockdown. **(i)** Apoptosis cell percentage of HEYA8 cells knocking down BCL2 and BCL2L12 was determined with flow cytometry. All function experiments were conducted with n = 3 biological repeats. P-value was obtained by unpaired Student's t-test, two-tailed **(b, c, d, f, i)**, and the results are presented as the mean  $\pm$  S.D. \*p < 0.05, \*\*p < 0.01. Source data are provided as a Source Data file.

Figure S8, related to Figure 8

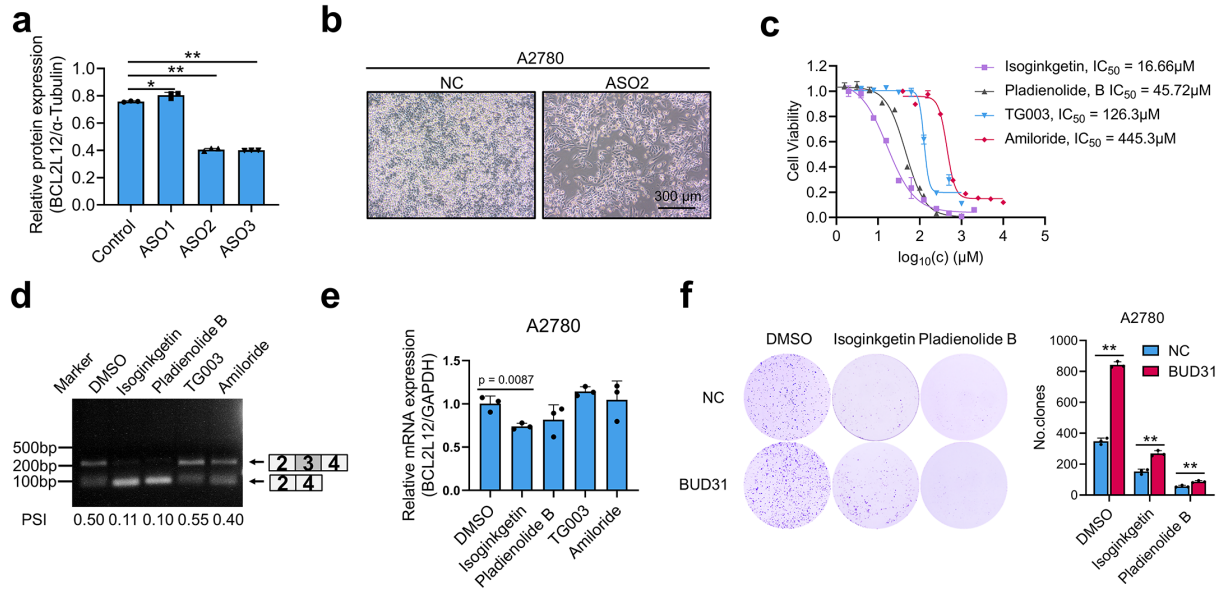

**Figure. S8. ASO2 and spliceosome inhibitors inhibit cell viability and induce *BCL2L12* exon**

**3 skipping, related to Figure 8. (a)** Protein quantification of the western blot results in Figure 8c.

**(b)** Cell morphology changes of A2780 cells under a microscope after 200 nM ASO2 treatment.

Scale bar, 300  $\mu$ m. **(c)** The viability of primary ovarian cancer cells OVBWZX treated with cisplatin,

isoginkgetin (an inhibitor of U4/6-U5 snRNP), pladienolide B (a U2 snRNP inhibitor targeting SF3B1), TG003 (CLK inhibitors), and amiloride (affect splicing factor phosphorylation).

**(d)** Semi-quantitative RT-PCR detected *BCL2L12* alternative splicing pattern after spliceosome inhibitors

treatment. **(e)** Relative mRNA expression of *BCL2L12* was determined with RT-qPCR after inhibitors treatment. Ovarian cancer A2780 cells were treated with 100 nM Pladienolides B for 12h,

30  $\mu$ M isoginkgetin for 12h, 10  $\mu$ M TG003 for 24h, 100  $\mu$ M amiloride for 24h. **(f)** Spliceosome

inhibitors isoginkgetin and pladienolide B attenuated the clonogenic ability improved by BUD31

overexpression through altering the *BCL2L12* alternative splicing pattern. All function experiments

were conducted with n = 3 biological repeats. P-value was obtained by two-tailed unpaired Student's

t-test **(a, c, e, f)**, and the results are presented as the mean  $\pm$  S.D. \*p < 0.05, \*\*p < 0.01

**Supplementary Table 1**

Correlation between BUD31 expression and clinicopathological characteristics

| Clinicopathological Feature   | Number | BUD31 expression |      | <i>p</i> value |
|-------------------------------|--------|------------------|------|----------------|
|                               |        | Low              | High |                |
| <b>Age (years)</b>            |        |                  |      |                |
| <60                           | 103    | 50               | 53   | 0.0172*        |
| ≥60                           | 46     | 32               | 14   |                |
| <b>FIGO Staging</b>           |        |                  |      |                |
| I-II                          | 36     | 23               | 13   | 0.2391         |
| III-IV                        | 112    | 59               | 53   |                |
| <b>CA 125 in serum (U/mL)</b> |        |                  |      |                |
| <500                          | 54     | 28               | 26   | 0.5561         |
| ≥500                          | 95     | 54               | 41   |                |
| <b>Relapse</b>                |        |                  |      |                |
| No                            | 28     | 20               | 8    | 0.0619         |
| Yes                           | 97     | 50               | 47   |                |
| <b>Platinum status</b>        |        |                  |      |                |
| Sensitive                     | 34     | 21               | 13   | 0.2273         |
| Resistance                    | 12     | 5                | 7    |                |
| <b>Lymph node metastasis</b>  |        |                  |      |                |
| Present                       | 22     | 10               | 12   | 0.3508         |
| Absent                        | 29     | 17               | 12   |                |
| <b>Omentum metastasis</b>     |        |                  |      |                |
| Present                       | 95     | 49               | 46   | 0.2099         |
| Absent                        | 53     | 33               | 20   |                |

The chi-square test was used to analyze the differences in clinical characteristics. \* $p < 0.05$

**Supplementary Table 2 Sequence Information**

| Method       | Name               | Sequence (5' - 3')                                              |
|--------------|--------------------|-----------------------------------------------------------------|
| semi-PCR     | BCL2L12-E2-F       | TCTCCTGTTCCA ACTCCACC                                           |
| semi-PCR     | BCL2L12-E4-R       | TTTCAGCTGCTCTTG GACCA                                           |
| semi-PCR     | E2F4-semiRI-F      | TGTTTTGGAAGGTATCGGGC                                            |
| semi-PCR     | E2F4-semiRI-R      | TGGTCTAGTTCTTGCTCCCG                                            |
| semi-PCR     | CDK16-semiRI-F     | AACTACCCCAAGTACCGAGC                                            |
| semi-PCR     | CDK16-semiRI-R     | AACAGCTTGGTGAGGAGGTC                                            |
| semi-PCR     | RBCK1-semi-F       | ACAGGTGGCAATGAAGTGTG                                            |
| semi-PCR     | RBCK1-semi-Stop-R  | CCACAGGAATTAACGGAAGAAGT                                         |
| semi-PCR     | RBCK1-semi-L-R     | CTGTCATATCAGGGCGCACT                                            |
| RIP-qPCR     | BCL2L12-exon1-F    | GGGTTCCCTTCCCATATCCAT                                           |
| RIP-qPCR     | BCL2L12-exon1-R    | ATTGAGGGAGTGGAGGGTCT                                            |
| RIP-qPCR     | BCL2L12-exon2-F    | AAGACACGCTGAGGGTCCTA                                            |
| RIP-qPCR     | BCL2L12- exon2-R   | GGTGGAGTTGGAACAGGAGA                                            |
| RIP-qPCR     | BCL2L12-exon3-F    | CCCAAGAAGAGCCAACAGAC                                            |
| RIP-qPCR     | BCL2L12- exon3-R   | CAGGGAGCAGGGAAGACATC                                            |
| RIP-qPCR     | BCL2L12- intron2-F | GGCTCCCTCCTAACTCTTGC                                            |
| RIP-qPCR     | BCL2L12- intron2-R | CCTGCAAGCAGTCTCTTTCC                                            |
| RIP-qPCR     | BCL2L12-exon2-3-F  | GGTCTCCTGTTCCA ACTCCA                                           |
| RIP-qPCR     | BCL2L12-exon2-3-R  | CAGGGAGCAGGGAAGACAT                                             |
| RIP-qPCR     | BCL2L12-e3-i3-F    | TGGTTTAGAGCCTGGTAAGAGA                                          |
| RIP-qPCR     | BCL2L12-e3-i3-R    | AGCCAACCCACAGAATTGAC                                            |
| Construction | BUD31- pTRIPZ-F    | ACGAAGGGCGGAGGAGGATCCATGCCTAAAGTCAAAA<br>GA                     |
| Construction | BUD31- pTRIPZ-R    | TGCCGTCATAGCGCGTTAATTAATCAGCCAGAGCAGCC<br>ACG                   |
| RNA-pulldown | BCL2L12-E3-I3-F    | TAATACGACTCACTATAGGGTGGTTTAGAGCCTGGTAA<br>GAGA                  |
| RNA-pulldown | BCL2L12-E3-I3mt-F  | TAATACGACTCACTATAGGGTGGTTTAGAGCCTGCGCA<br>GAGATTTCCATGATCATCTAT |
| RNA-pulldown | BCL2L12-E3-I3-R    | AGCCAACCCACAGAATTGAC                                            |
| qPCR         | BUD31-F            | CATTCAGACACGGGACACCA                                            |
| qPCR         | BUD31-R            | ATGATGCGGCCCACTTCC                                              |
| qPCR         | BCL2L12-F          | AAGACACGCTGAGGGTCCTA                                            |
| qPCR         | BCL2L12-R          | GGTGGAGTTGGAACAGGAGA                                            |
| qPCR         | BCL2L12-L-F        | CCCAAGAAGAGCCAACAGAC                                            |
| qPCR         | BCL2L12-L-R        | CAGGGAGCAGGGAAGACATC                                            |
| qPCR         | BCL2L12-S-F        | TCCACCTAGGCCAGCTAC                                              |
| qPCR         | BCL2L12-S-R        | CGGAGATTCAGCTGCTCTT                                             |
| qPCR         | UPF1-F             | ACCTATTACACGAAGGACCTCC                                          |
| qPCR         | UPF1-R             | ACGTCCGTTGCAGAACCAC                                             |
| qPCR         | BCL2 -F            | GGTGGGGTCATGTGTGTGG                                             |
| qPCR         | BCL2 -R            | CGGTTCAAGTACTCAGTCATCC                                          |
| qPCR         | GAPDH-F            | CAGAACATCATCCCTGCCTCTAC                                         |

|                       |               |                                             |
|-----------------------|---------------|---------------------------------------------|
| <b>qPCR</b>           | GAPDH-R       | TTGAAGTCAGAGGAGACCACCTG                     |
| <b>ASO design</b>     | BCL2L12-ASO-1 | C*A*G*G*C*T*C*TAAACCA*T*A*G*C*A*G           |
| <b>ASO design</b>     | BCL2L12-ASO-2 | G*A*A*A*T*C*T*C*T*TACCAGG*C*T*C*T*A*A*A*C   |
| <b>ASO design</b>     | BCL2L12-ASO-3 | C*A*T*A*G*A*T*GATCATG*G*A*A*A*T*C*T*C       |
| <b>ASO design</b>     | ASO-control   | C*C*T*C*T*T*A*C*C*TCAGTTA*C*A*A*T*T*T*A*T*A |
| <b>siRNA sequence</b> | siUPF1#1      | GAUGCAGUUCCGCUCCAUU                         |
| <b>siRNA target</b>   | siUPF1#2      | AGAGCGCATTGAAAACGTT                         |
| <b>siRNA target</b>   | siBCL2L12#1   | GCGGGAAAGTTGAACTAAT                         |
| <b>siRNA target</b>   | siBCL2L12#2   | AGCGTCACATGCAAATTGA                         |
| <b>siRNA target</b>   | siCHERP       | CCACCCTCATCAACGAGTA                         |
| <b>siRNA target</b>   | siSRSF4       | GAATCACGCTCCAGATCAA                         |
| <b>siRNA target</b>   | siMATR3       | GCAGGAACCTAATATGCTT                         |
| <b>siRNA sequence</b> | siSF3B4       | GGAUGAGAAGGUUAGUGAATT                       |
| <b>siRNA sequence</b> | siSF3B1       | GUAUUUGGGUGAAGAGUACTT                       |
| <b>siRNA target</b>   | siBUD31#1     | GGAGTTGATTGAGCCAACA                         |
| <b>siRNA target</b>   | siBUD31#2     | CTGGATGAATTAGATCAAA                         |
| <b>siRNA target</b>   | siBUD31#3     | TCTTCGACCTCTTTTACAA                         |
| <b>siRNA target</b>   | siRBCK1       | GCGTGTTATGCACTCAATAATAA                     |
| <b>siRNA target</b>   | siBCL2        | GGAGAACAGGGTACGATAA                         |
| <b>siRNA sequence</b> | siNC          | UUCUCCGAACGUGUCACGUTT                       |

\*: indicated phosphorothioate modifications.

**Supplementary Table 3 Key resources table**

| REAGENT or RESOURCE                           | SOURCE                       | IDENTIFIER                          |
|-----------------------------------------------|------------------------------|-------------------------------------|
| <b>Antibodies</b>                             |                              |                                     |
| Rabbit polyclonal anti-BUD31                  | Proteintech                  | 11798-1-AP;<br>RRID:<br>AB_2274894  |
| Mouse monoclonal anti-alpha-Tubulin           | Proteintech                  | 66031-1-Ig;<br>RRID:<br>AB_11042766 |
| Rabbit polyclonal anti-SF3B1                  | Proteintech                  | 27684-1-AP;<br>RRID:<br>AB_2880946  |
| Rabbit polyclonal anti-PARP1                  | Proteintech                  | 13371-1-AP;<br>RRID:<br>AB_2160459  |
| Rabbit polyclonal anti-Cleaved-Caspase3       | Cell Signaling<br>Technology | #9661; RRID:<br>AB_2341188          |
| Rabbit polyclonal anti-Caspase3               | Cell Signaling<br>Technology | #9662; RRID:<br>AB_331439           |
| Rabbit monoclonal anti-SC35                   | Abcam                        | ab204916; RRID:<br>AB_2909393       |
| Rabbit polyclonal anti-Bax                    | Affinity                     | AF0120; RRID:<br>AB_2833304         |
| Mouse monoclonal anti-BCL2                    | Origene                      | TA803003;<br>RRID:<br>AB_2626627    |
| Rabbit polyclonal anti-U2AF1                  | ABclonal                     | A6076; RRID:<br>AB_2766739          |
| Rabbit polyclonal anti-HNRNPU                 | ABclonal                     | A3917; RRID:<br>AB_2765383          |
| Rabbit polyclonal anti-SART1                  | ABclonal                     | A8569; RRID:<br>AB_2772144          |
| Rabbit polyclonal anti-SNRPA1                 | ABclonal                     | A12161; RRID:<br>AB_2759048         |
| Rabbit monoclonal anti-BCL2L12                | Abways                       | CY9733                              |
| Rabbit monoclonal anti-E2F4                   | Zen bioscience               | R24161                              |
| Rabbit monoclonal anti-CDK16                  | Zen bioscience               | R26239                              |
| Mouse monoclonal anti-HuR                     | Thermo Scientific            | 1862775                             |
| Rabbit polyclonal anti-GAPDH                  | Zen bioscience               | 380626                              |
| <b>Bacterial and virus strains</b>            |                              |                                     |
| Escherichia coli BL21(DE3) competent cells    | Vazyme                       | C504-02                             |
| Escherichia coli DH5 $\alpha$ competent cells | Vazyme                       | C502-02                             |
| <b>Biological samples</b>                     |                              |                                     |



|                                                                               |                                                        |                   |
|-------------------------------------------------------------------------------|--------------------------------------------------------|-------------------|
| HGSOC specimens and fallopian tube tissues                                    | Department of Obstetrics and Gynecology, Qilu Hospital | N/A               |
| Ascites-derived ovarian cancer cells from patients                            | Department of Obstetrics and Gynecology, Qilu Hospital | N/A               |
| Chemicals, peptides, and recombinant proteins                                 |                                                        |                   |
| Isopropyl $\beta$ -D-thiogalactoside                                          | BBI                                                    | A600168           |
| Penicillin-Streptomycin Solution, 100X                                        | Biosharp                                               | BL505A            |
| Sodium pyruvate                                                               | Sigma                                                  | P4562             |
| Insulin                                                                       | Macgene                                                | CC101             |
| Dimethyl sulfoxide (DMSO)                                                     | Aladding                                               | D103277           |
| Doxycycline hydrochloride                                                     | BBI                                                    | A600889           |
| D-Luciferin, Sodium Salt                                                      | Yeaston                                                | 40901ES01         |
| Chloral hydrate                                                               | Sangon                                                 | A600288           |
| Cisplatin                                                                     | Sigma                                                  | PHR1624           |
| Pladienolides B                                                               | Santa Cruz                                             | sc-391691         |
| Isoginkgetin                                                                  | MedChemExpress                                         | HY-N2117          |
| TG003                                                                         | MedChemExpress                                         | HY-15338          |
| Amiloride hydrochloride                                                       | Targetmol                                              | T0175             |
| Crystal violet                                                                | Solarbio                                               | C8470             |
| Trypsin without ethylenediaminetetraacetic acid (EDTA)                        | Macgene                                                | CC035             |
| Critical commercial assays                                                    |                                                        |                   |
| His-tag Protein Purification Kit                                              | Beyotime                                               | P2226             |
| Cell Total RNA Isolation Kit                                                  | Foregene                                               | RE-03111          |
| Cell-Light EdU Apollo567 In Vitro Kit                                         | RiboBio                                                | C10310-1          |
| RNAMAX-T7 in vitro transcription kit                                          | RiboBio                                                | C11001-1          |
| Annexin V-PE/7-AAD Apoptosis Detection Kit                                    | Vazyme                                                 | A213-01           |
| TUNEL Cell Apoptosis Detection Kit                                            | KEYGEN                                                 | KGA703            |
| Pierce™ RNA 3' End Desthiobiotinylation Kit                                   | Thermo Fisher Scientific                               | 20163             |
| Magnetic RNA Protein Pull-Down Kit                                            | Thermo Fisher Scientific                               | 20164             |
| CoolShift-BTr RNA EMSA Kit                                                    | Viagene                                                | SIDET102          |
| Spin Column RNA Cleanup & Concentration Kit                                   | Sangon                                                 | B518688           |
| Nucleoprotein Extraction Kit                                                  | Sangon                                                 | C500009           |
| EZ-Nuclear RIP Kit                                                            | Merck Millipore                                        | 17-701            |
| Deposited data                                                                |                                                        |                   |
| RNA sequencing (RNA-seq) of BUD31 knockdown by shRNA in ovarian cancer cells  | This paper                                             | GEO:<br>GSE183449 |
| RNA immunoprecipitation sequencing (RIP-seq) of BUD31 in ovarian cancer cells | This paper                                             | GEO:<br>GSE183450 |

|                                                     |                                        |                                                                                                                                               |
|-----------------------------------------------------|----------------------------------------|-----------------------------------------------------------------------------------------------------------------------------------------------|
| SpyCLIP sequencing of BUD31 in ovarian cancer cells | This paper                             | GEO:<br>GSE183451                                                                                                                             |
| Experimental models: Cell lines                     |                                        |                                                                                                                                               |
| Human: A2780 ovarian cancer cell line               | Jian-Jun Wei' lab                      | N/A                                                                                                                                           |
| Human: HEY ovarian cancer cell line                 | Jian-Jun Wei' lab                      | N/A                                                                                                                                           |
| Human: OV90 ovarian cancer cell line                | ATCC                                   | CRL-11732                                                                                                                                     |
| Human: OVCAR3 ovarian cancer cell line              | ATCC                                   | HTB-161                                                                                                                                       |
| Mouse: ID8 Ovarian Surface Epithelial Cell Line     | Sigma-Aldrich                          | SCC145                                                                                                                                        |
| Experimental models: Organisms/strains              |                                        |                                                                                                                                               |
| Mouse: CAnN.Cg-Foxn1nu/CrIVr                        | Vitalriver                             | BALB/c-nude mice                                                                                                                              |
| Oligonucleotides                                    |                                        |                                                                                                                                               |
| See Supplementary Table 2                           | This paper                             | N/A                                                                                                                                           |
| Recombinant DNA                                     |                                        |                                                                                                                                               |
| Doxycycline-inducible lentiviral vector pTRIPZ-NC   | Zhao et al., 2019 (PMID: 30715466)     | N/A                                                                                                                                           |
| SpyCatcher-pET-28a                                  | Zhao et al., 2019 (PMID: 30715466)     | N/A                                                                                                                                           |
| pZIP-TRE3G-shBUD31                                  | Transomic                              | TLHSU2300                                                                                                                                     |
| pENTER-BUD31                                        | WZ Biosciences                         | CH803738                                                                                                                                      |
| pENTER-BCL2L12                                      | WZ Biosciences                         | CH801321                                                                                                                                      |
| Software and algorithms                             |                                        |                                                                                                                                               |
| FastQC v0.11.9                                      | N/A                                    | <a href="https://www.bioinformatics.babraham.ac.uk/projects/fastqc/">https://www.bioinformatics.babraham.ac.uk/projects/fastqc/</a>           |
| Trimalore v0.6.1                                    | N/A                                    | <a href="https://www.bioinformatics.babraham.ac.uk/projects/trim_galore/">https://www.bioinformatics.babraham.ac.uk/projects/trim_galore/</a> |
| bowtie v1.2.3                                       | Langmead et al., 2009 (PMID: 19261174) | <a href="http://bowtie-bio.sourceforge.net/index.shtml">http://bowtie-bio.sourceforge.net/index.shtml</a>                                     |
| STAR v2.7.1a                                        | Dobin et al., 2013 (PMID: 23104886)    | <a href="https://github.com/alexdobin/STAR">https://github.com/alexdobin/STAR</a>                                                             |
| HISAT2 v2.2.0                                       | Zhang et al., 2021 (PMID: 34103331)    | <a href="http://daehwankimlab.github.io/hisat2/">http://daehwankimlab.github.io/hisat2/</a>                                                   |
| Salmon v0.6.0                                       | Patro et al., 2017 (PMID: 28263959)    | <a href="https://combine-lab.github.io/salmon/">https://combine-lab.github.io/salmon/</a>                                                     |

|                                                |                                                  |                                                                                                                                                                                           |
|------------------------------------------------|--------------------------------------------------|-------------------------------------------------------------------------------------------------------------------------------------------------------------------------------------------|
| Picard v2.25.5                                 | N/A                                              | <a href="https://gatk.broadinstitute.org/hc/en-us/articles/360057439771-MarkDuplicates-Picard-">https://gatk.broadinstitute.org/hc/en-us/articles/360057439771-MarkDuplicates-Picard-</a> |
| Qualimap v2.2.2                                | García-Alcalde et al., 2012 (PMID: 22914218)     | <a href="http://qualimap.conesalab.org/">http://qualimap.conesalab.org/</a>                                                                                                               |
| Samtools v1.10                                 | Li et al., 2009 (PMID: 19505943)                 | <a href="http://samtools.sourceforge.net/">http://samtools.sourceforge.net/</a>                                                                                                           |
| StringTie v1.3.0                               | Kovaka S et al., 2019 (PMID: 31842956)           | <a href="http://ccb.jhu.edu/software/stringtie/">http://ccb.jhu.edu/software/stringtie/</a>                                                                                               |
| featureCounts v2.0.0                           | Liao Y et al., 2014 (Liao Y et al., 2014)        | <a href="http://subread.sourceforge.net/featureCounts.html">http://subread.sourceforge.net/featureCounts.html</a>                                                                         |
| rMATS v4.1.0                                   | Shen et al., 2014 (PMID: 25480548)               | <a href="http://rnaseq-mats.sourceforge.net/">http://rnaseq-mats.sourceforge.net/</a>                                                                                                     |
| ASprofile                                      | Florea L et al., 2013 (PMID: 24555089)           | <a href="http://ccb.jhu.edu/software/ASprofile/">http://ccb.jhu.edu/software/ASprofile/</a>                                                                                               |
| MISO (Mixture of Isoforms) v0.5.4              | Katz et al., 2010 (PMID: 21057496)               | <a href="https://miso.readthedocs.io/en/fastmiso/">https://miso.readthedocs.io/en/fastmiso/</a>                                                                                           |
| TCGASpliceseq                                  | Ryan M et al., 2016 (PMID: 26602693)             | <a href="https://bioinformatics.mdanderson.org/TCGASpliceSeq/">https://bioinformatics.mdanderson.org/TCGASpliceSeq/</a>                                                                   |
| IsoformSwitchAnalyzeR v3.13                    | Vitting-Seerup et al., 2019 (PMID: 30989184)     | <a href="https://github.com/kvittingseerup/IsoformSwitchAnalyzeR">https://github.com/kvittingseerup/IsoformSwitchAnalyzeR</a>                                                             |
| Coding Potential Assessment Tool (CPAT) v1.2.1 | Wang et al., 2013 (PMID: 23335781)               | <a href="http://lilab.research.bcm.edu/">http://lilab.research.bcm.edu/</a>                                                                                                               |
| Pfam v34.0                                     | Mistry et al., 2021 (PMID: 33125078)             | <a href="https://pfam.xfam.org/">https://pfam.xfam.org/</a>                                                                                                                               |
| Signalp v5.0b                                  | Almagro Armenteros et al., 2019 (PMID: 30778233) | <a href="http://www.cbs.dtu.dk/services/SignalP/">http://www.cbs.dtu.dk/services/SignalP/</a>                                                                                             |
| SpliceR v1.14.0                                | Vitting-Seerup et al., 2014 (PMID: 24655717)     | <a href="http://www.biocductor.org/packages/2.13/bioc/html/spliceR.html">http://www.biocductor.org/packages/2.13/bioc/html/spliceR.html</a>                                               |

|                                          |                                           |                                                                                                                                             |
|------------------------------------------|-------------------------------------------|---------------------------------------------------------------------------------------------------------------------------------------------|
| edgeR v3.34.0                            | Robinson et al., 2010 (PMID: 19910308)    | <a href="https://bioconductor.org/packages/release/bioc/html/edgeR.html">https://bioconductor.org/packages/release/bioc/html/edgeR.html</a> |
| Survival v3.2-11                         | N/A                                       | <a href="https://cran.r-project.org/web/packages/survival/index.html">https://cran.r-project.org/web/packages/survival/index.html</a>       |
| Survminer v0.4.9                         | N/A                                       | <a href="https://github.com/kassambara/survminer/">https://github.com/kassambara/survminer/</a>                                             |
| ggplot2 v3.3.5                           | N/A                                       | <a href="https://ggplot2.tidyverse.org">https://ggplot2.tidyverse.org</a>                                                                   |
| PURECLIP v1.2.0                          | Krakau et al., 2017 (PMID: 29284540)      | <a href="https://github.com/skrakau/PureCLIP">https://github.com/skrakau/PureCLIP</a>                                                       |
| HOMER v4.11                              | Heinz et al., 2010 (PMID: 20513432)       | <a href="http://homer.ucsd.edu/homer/">http://homer.ucsd.edu/homer/</a>                                                                     |
| deeptools v3.1.3                         | N/A                                       | <a href="https://github.com/jernejule/clip-data-science">https://github.com/jernejule/clip-data-science</a>                                 |
| UCSC Xena                                | Goldman et al., 2020 (PMID: 32444850)     | <a href="https://xenabrowser.net">https://xenabrowser.net</a>                                                                               |
| PANTHER                                  | N/A                                       | <a href="http://pantherdb.org/">http://pantherdb.org/</a>                                                                                   |
| Gene Ontology                            | The Gene Ontology, 2019 (PMID: 30395331)  | <a href="http://geneontology.org/">http://geneontology.org/</a>                                                                             |
| Gene Set Enrichment Analysis             | Subramanian et al., 2005 (PMID: 16199517) | <a href="https://www.gsea-msigdb.org/gsea">https://www.gsea-msigdb.org/gsea</a>                                                             |
| Kaplan-Meier plotter                     | N/A                                       | <a href="http://kmplot.com/analysis/">http://kmplot.com/analysis/</a>                                                                       |
| R/Bioconductor v3.6.3                    | N/A                                       | <a href="http://www.r-project.org/">http://www.r-project.org/</a>                                                                           |
| GraphPad Prism 8                         | N/A                                       | <a href="https://www.graphpad.com/scientific-software/prism/">https://www.graphpad.com/scientific-software/prism/</a>                       |
| ImageJ v2.1.0                            | Schneider et al., 2012 (PMID: 22930834)   | <a href="https://imagej.nih.gov/ij/">https://imagej.nih.gov/ij/</a>                                                                         |
| Integrative Genomics Viewer (IGV) v2.8.2 | Robinson et al., 2017 (PMID: 29092934)    | <a href="https://igv.org/">https://igv.org/</a>                                                                                             |
| Other                                    |                                           |                                                                                                                                             |

|                                                                           |                                         |                                                                                                               |
|---------------------------------------------------------------------------|-----------------------------------------|---------------------------------------------------------------------------------------------------------------|
| Code used to analyze data and generate figures                            | This study                              | <a href="https://github.com/PrinceWang2018/BUD31_BCL2L12">https://github.com/PrinceWang2018/BUD31_BCL2L12</a> |
| Visualization of binding regions distributions around the regulated exons | Anob et al., 2017 (doi: 10.1101/208124) | <a href="https://github.com/jernejule/clip-data-science">https://github.com/jernejule/clip-data-science</a> . |
