# Supplementary material for: Splicing factor BUD31 promotes ovarian cancer progression through sustaining the expression of anti-apoptotic BCL2L12
Source: PubMed Central journal article supplement (PMC9587234; doi:10.1038/s41467-022-34042-w), 2022-10-21
Supplement: 41467_2022_34042_MOESM3_ESM.pdf [file 41467_2022_34042_MOESM3_ESM.pdf]

## **Description of Additional Supplementary Files**

File Name: Supplementary Data 1

Description: Differentially expressed splicing factors and prognostic analysis

File Name: Supplementary Data 2

Description: BUD31 interacting proteins identified by IP-MS

File Name: Supplementary Data 3

Description: Target genes of BUD31
